# Supplementary material for: Early screening for post-stroke depression, and the effect on functional outcomes, quality of life and mortality: a protocol for a systematic review and meta-analysis
Source: PubMed Central journal article supplement — BMJ Open. 2021 Aug 17;11(8):e050451. doi: 10.1136/bmjopen-2021-050451 (PMC8372879; doi:10.1136/bmjopen-2021-050451), 2021-08-17
Supplement: bmjopen-2021-050451supp002.pdf [file bmjopen-2021-050451supp002.pdf]

**Supplementary Materials file 2: preliminary search strategy****Source:** PubMed**Search date:** 2021-07-30**Search specifications:** All search terms are searched in the search fields “title”, “abstract” and in MeSH (when available). A filter for English language is applied.**Result:** 2,291**Preliminary search strategy:**

| Search notes                                                | Search string                                                                                                                                                                                                                                                                                                                                                                                                                                                                                                                                                                                                                                                                                                                                                                                                                                                                                                                                                                                                                                                                                                                                                                                                                                                                          | Results          |
|-------------------------------------------------------------|----------------------------------------------------------------------------------------------------------------------------------------------------------------------------------------------------------------------------------------------------------------------------------------------------------------------------------------------------------------------------------------------------------------------------------------------------------------------------------------------------------------------------------------------------------------------------------------------------------------------------------------------------------------------------------------------------------------------------------------------------------------------------------------------------------------------------------------------------------------------------------------------------------------------------------------------------------------------------------------------------------------------------------------------------------------------------------------------------------------------------------------------------------------------------------------------------------------------------------------------------------------------------------------|------------------|
| <b>Search no. 1:</b><br>“Stroke” and relevant synonyms.     | ("Stroke"[Mesh] OR Stroke*[Title/Abstract] OR "Cerebrovascular Accident*[Title/Abstract] OR CVA[Title/Abstract] OR CVAs[Title/Abstract] OR "Cerebrovascular Apoplexy"[Title/Abstract] OR "Brain Vascular Accident*[Title/Abstract])                                                                                                                                                                                                                                                                                                                                                                                                                                                                                                                                                                                                                                                                                                                                                                                                                                                                                                                                                                                                                                                    | <b>291,278</b>   |
| <b>Search no. 2:</b><br>“Depression” and relevant synonyms. | (depression*[Title/Abstract] OR depressed[Title/Abstract] OR depressive[Title/Abstract] OR "Depression"[Mesh] OR "post-traumatic stress disorder"[Title/Abstract] OR "PTSD"[Title/Abstract] OR "Stress Disorders, Post-Traumatic"[Mesh] OR "Depressive Disorder"[Mesh:NoExp] OR "Depressive Disorder, Major"[Mesh])                                                                                                                                                                                                                                                                                                                                                                                                                                                                                                                                                                                                                                                                                                                                                                                                                                                                                                                                                                    | <b>505,719</b>   |
| <b>Search no. 3:</b><br>“Screening” and relevant synonyms.  | ("Mass Screening"[Mesh:NoExp] OR screen*[Title/Abstract] OR diagnos*[Title/Abstract] OR "Diagnosis"[Mesh:NoExp] OR assess*[Title/Abstract] OR "hospital anxiety and depression scale"[Title/Abstract] OR "HADS-D"[Title/Abstract] OR "CES-D"[Title/Abstract] OR "HDRS"[Title/Abstract] OR "geriatric depression scale"[Title/Abstract] OR "GDS"[Title/Abstract] OR "Patient Health Questionnaire"[Title/Abstract] OR "PHQ-9"[Title/Abstract] OR "Patient Health Questionnaire"[Mesh] OR "Beck depression inventory"[Title/Abstract] OR "BDI"[Title/Abstract] OR "stroke aphasia depression questionnaire"[Title/Abstract] OR "Stroke Aphasic Depression Questionnaire"[Title/Abstract] OR "SADQ"[Title/Abstract] OR "Aphasia depression rating scale"[Title/Abstract] OR "ADRS"[Title/Abstract] OR "International Classification of Diseases"[Mesh] OR "ICD-10"[Title/Abstract] OR "International Classification of Diseases"[Title/Abstract] OR "ICD-9"[Title/Abstract] OR "Montgomery-Åsberg Rating Scale"[Title/Abstract] OR "MADRS"[Title/Abstract] OR "Hamilton Depression Rating Scale"[Title/Abstract] OR "Hamilton Rating Scale"[Title/Abstract] OR "HAM-D"[Title/Abstract] OR "Center for Epidemiologic Studies Depression Scale"[Title/Abstract] OR "CES-D"[Title/Abstract]) | <b>5,454,153</b> |
| <b>Search no. 4:</b><br>Study types.                        | (prospective[Title/Abstract] OR "follow-up"[Title/Abstract] OR followup[Title/Abstract] OR longitudinal[Title/Abstract] OR "long-term"[Title/Abstract] OR cohort[Title/Abstract] OR "Cohort Studies"[Mesh:NoExp] OR "Follow-Up Studies"[Mesh] OR "Longitudinal Studies"[Mesh] OR "Prospective Studies"[Mesh])                                                                                                                                                                                                                                                                                                                                                                                                                                                                                                                                                                                                                                                                                                                                                                                                                                                                                                                                                                          | <b>3,002,928</b> |

|                                                                                     |                                                                                                                                                                                                                                                                                                                                                                                                                                                                                                                                                                                                                                                                                                                                                                                                                                                                                                                                                                                                                                                                                                                                                                                                                                                                                                                                                                                                                                                                                                                                                                                                                                                                                                                                                                                                                                                                                                                                                                                                                                                                                                                                                                                   |                     |
|-------------------------------------------------------------------------------------|-----------------------------------------------------------------------------------------------------------------------------------------------------------------------------------------------------------------------------------------------------------------------------------------------------------------------------------------------------------------------------------------------------------------------------------------------------------------------------------------------------------------------------------------------------------------------------------------------------------------------------------------------------------------------------------------------------------------------------------------------------------------------------------------------------------------------------------------------------------------------------------------------------------------------------------------------------------------------------------------------------------------------------------------------------------------------------------------------------------------------------------------------------------------------------------------------------------------------------------------------------------------------------------------------------------------------------------------------------------------------------------------------------------------------------------------------------------------------------------------------------------------------------------------------------------------------------------------------------------------------------------------------------------------------------------------------------------------------------------------------------------------------------------------------------------------------------------------------------------------------------------------------------------------------------------------------------------------------------------------------------------------------------------------------------------------------------------------------------------------------------------------------------------------------------------|---------------------|
| <p><b>Search no. 5:</b></p> <p>Combination of search no.: (1 AND 2 AND 3 AND 4)</p> | <p>((("Stroke"[Mesh] OR Stroke*[Title/Abstract] OR "Cerebrovascular Accident*[Title/Abstract] OR CVA[Title/Abstract] OR CVAs[Title/Abstract] OR "Cerebrovascular Apoplexy"[Title/Abstract] OR "Brain Vascular Accident*[Title/Abstract] AND (depression*[Title/Abstract] OR depressed[Title/Abstract] OR depressive[Title/Abstract] OR "Depression"[Mesh] OR "post-traumatic stress disorder"[Title/Abstract] OR "PTSD"[Title/Abstract] OR "Stress Disorders, Post-Traumatic"[Mesh] OR "Depressive Disorder"[Mesh:NoExp] OR "Depressive Disorder, Major"[Mesh]) AND ("Mass Screening"[Mesh:NoExp] OR screen*[Title/Abstract] OR diagnos*[Title/Abstract] OR "Diagnosis"[Mesh:NoExp] OR assess*[Title/Abstract] OR "hospital anxiety and depression scale"[Title/Abstract] OR "HADS-D"[Title/Abstract] OR "CES-D"[Title/Abstract] OR "HDRS"[Title/Abstract] OR "geriatric depression scale"[Title/Abstract] OR "GDS"[Title/Abstract] OR "Patient Health Questionnaire"[Title/Abstract] OR "PHQ-9"[Title/Abstract] OR "Patient Health Questionnaire"[Mesh] OR "Beck depression inventory"[Title/Abstract] OR "BDI"[Title/Abstract] OR "stroke aphasia depression questionnaire"[Title/Abstract] OR "Stroke Aphasic Depression Questionnaire"[Title/Abstract] OR "SADQ"[Title/Abstract] OR "Aphasia depression rating scale"[Title/Abstract] OR "ADRS"[Title/Abstract] OR "International Classification of Diseases"[Mesh] OR "ICD-10"[Title/Abstract] OR "International Classification of Diseases"[Title/Abstract] OR "ICD-9"[Title/Abstract] OR "Montgomery-Åsberg Rating Scale"[Title/Abstract] OR "MADRS"[Title/Abstract] OR "Hamilton Depression Rating Scale"[Title/Abstract] OR "Hamilton Rating Scale"[Title/Abstract] OR "HAM-D"[Title/Abstract] OR "Center for Epidemiologic Studies Depression Scale"[Title/Abstract] OR "CES-D"[Title/Abstract]) AND (prospective[Title/Abstract] OR "follow-up"[Title/Abstract] OR followup[Title/Abstract] OR longitudinal[Title/Abstract] OR "long-term"[Title/Abstract] OR cohort[Title/Abstract] OR "Cohort Studies"[Mesh:NoExp] OR "Follow-Up Studies"[Mesh] OR "Longitudinal Studies"[Mesh] OR "Prospective Studies"[Mesh]))</p> | <p><b>2,291</b></p> |
|-------------------------------------------------------------------------------------|-----------------------------------------------------------------------------------------------------------------------------------------------------------------------------------------------------------------------------------------------------------------------------------------------------------------------------------------------------------------------------------------------------------------------------------------------------------------------------------------------------------------------------------------------------------------------------------------------------------------------------------------------------------------------------------------------------------------------------------------------------------------------------------------------------------------------------------------------------------------------------------------------------------------------------------------------------------------------------------------------------------------------------------------------------------------------------------------------------------------------------------------------------------------------------------------------------------------------------------------------------------------------------------------------------------------------------------------------------------------------------------------------------------------------------------------------------------------------------------------------------------------------------------------------------------------------------------------------------------------------------------------------------------------------------------------------------------------------------------------------------------------------------------------------------------------------------------------------------------------------------------------------------------------------------------------------------------------------------------------------------------------------------------------------------------------------------------------------------------------------------------------------------------------------------------|---------------------|
